# Supplementary material
Source: PubMed Central journal article supplement (PMC5706617)
Supplement: Supp_Fig1.pdf [file Supp_Fig1.pdf]

## Supplementary Data

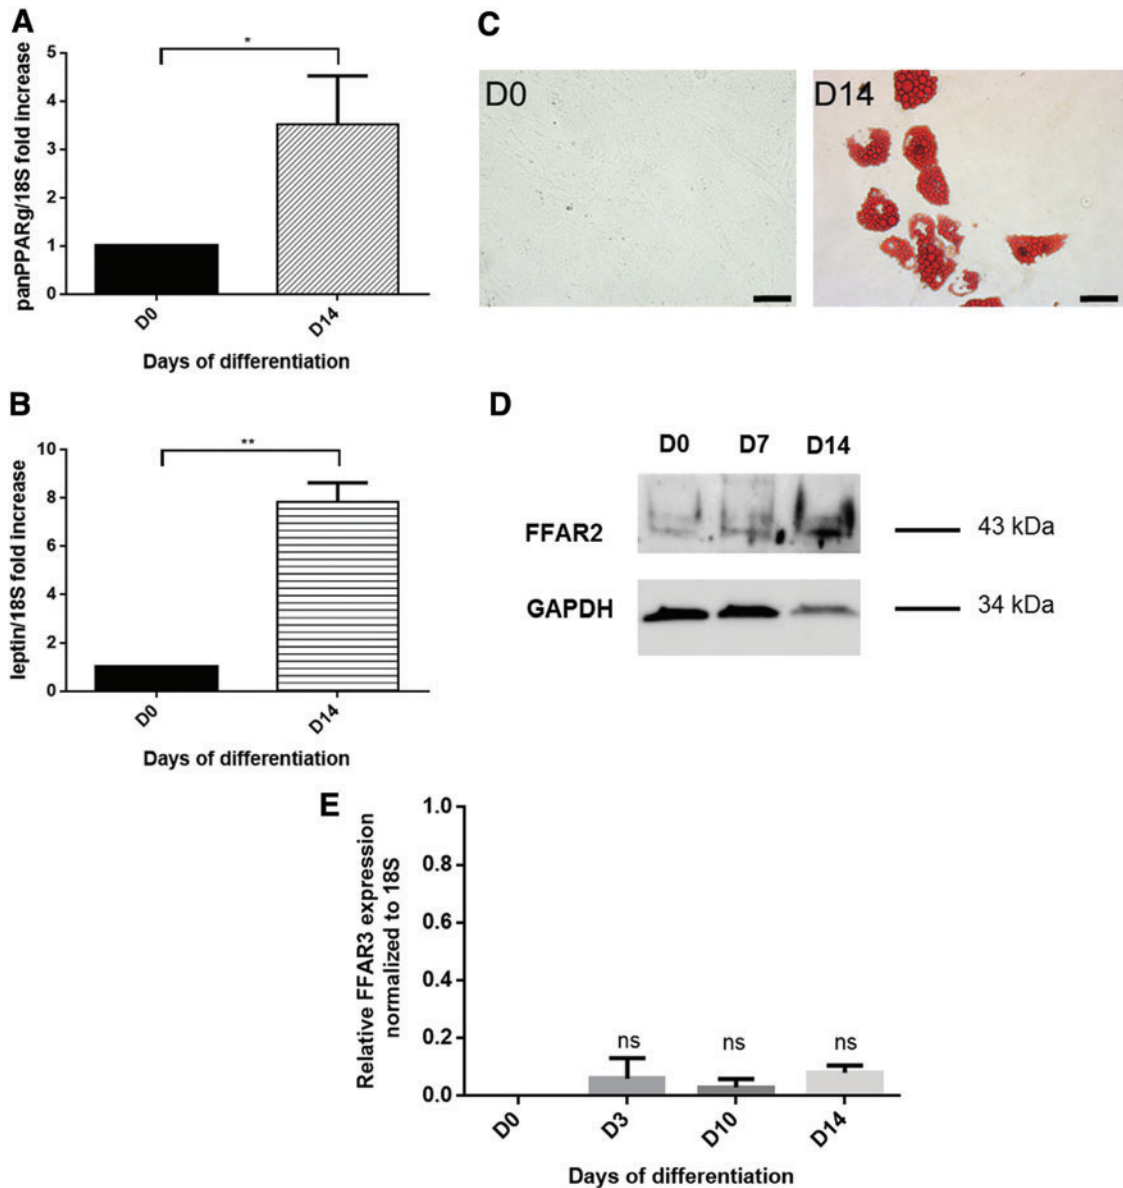

**SUPPLEMENTARY FIG. S1.** Chorion and hAMSC differentiated to adipocytes. The expression of the PPAR $\gamma$  (A) and leptin (B) genes were detected by RT-qPCR in cMSCs from two different donors at day 0 (D0) and day 14 (D14) of differentiation. The mRNA levels were normalized to 18S and are shown as fold increase (unpaired *t*-test,  $n=2$ ,  $*P<0.05$ ,  $**P<0.01$ ). Neutral lipid accumulation was detected by Oil Red O (red color) staining in hAMSCs (C) at the beginning (D0) and at the end (D14) of the 14-day long adipogenic differentiation (scale bar = 50  $\mu$ m). Western blot analysis of FFAR2 was done at days 0, 7, and 14 of adipogenic differentiation (D0, D7, D14) in hAMSCs by using a monoclonal FFAR2-specific antibody (D). GAPDH was applied as an internal control ( $n=1$ ). The expression of the FFAR3 gene was determined by RT-qPCR in cMSCs from one donor with three independent experiments at days 0, 3, 10, and 14 of differentiation (E). The mRNA levels were normalized to 18S (unpaired *t*-test,  $n=3$ ). cMSCs, chorion-derived mesenchymal stem cells; FFAR, free fatty acid receptor; hAMSCs, human adipose-derived mesenchymal stem cells; mRNA, messenger RNA; ns, not significant change; PPAR $\gamma$ , peroxisome proliferator-activated receptor- $\gamma$ ; RT-qPCR, reverse transcription-coupled quantitative polymerase chain reaction.
