# Supplementary material
Source: PubMed Central journal article supplement (PMC5706617)
Supplement: Supp_Table1.pdf [file Supp_Table1.pdf]

SUPPLEMENTARY TABLE S1. LIST OF ANTIBODIES

|                                                                          |                                         |
|--------------------------------------------------------------------------|-----------------------------------------|
| CD105 monoclonal antibody                                                | Thermo Fisher Scientific (Waltham, MA)  |
| Anti-CD73 monoclonal antibody                                            | Thermo Fisher Scientific                |
| CD45 monoclonal antibody                                                 | Thermo Fisher Scientific                |
| Purified mouse anti-human CD90                                           | BD Biosciences (Franklin Lakes, NJ)     |
| Purified mouse anti-human CD34                                           | BD Biosciences                          |
| Purified mouse anti-human HLA-G                                          | BD Biosciences                          |
| Novocastra liquid mouse monoclonal antibody vWF                          | Leica Biosystems (Nussloch, Germany)    |
| Mouse IgG1 isotype antibody                                              | Thermo Fisher Scientific                |
| Mouse IgG2b isotype antibody                                             | Thermo Fisher Scientific                |
| Anti-FFAR2/GPR43 polyclonal antibody                                     | Merck (Darmstadt, Germany)              |
| Anti-GPR43 monoclonal antibody                                           | Santa Cruz Biotechnology (Dallas, TX)   |
| GPR43 (3B3): sc-293202 monoclonal antibody                               | Santa Cruz Biotechnology                |
| Anti-FFAR2, C-terminal antibody                                          | Sigma-Aldrich (Saint Louis, MO)         |
| Anti-FFAR3/GPR41 monoclonal antibody                                     | Merck                                   |
| Cleaved PARP (Asp214) antibody (D64E10)                                  | Cell Signaling Technology (Danvers, MA) |
| Phospho-p44/42 MAPK (Erk1/2) (Thr202/Tyr204) antibody                    | Cell Signaling Technology               |
| p44/42 MAPK (Erk1/2) antibody (137F5)                                    | Cell Signaling Technology               |
| PPAR $\gamma$ antibody (E-8)                                             | Santa Cruz Biotechnology                |
| Ob (F3): sc-48408 monoclonal antibody                                    | Santa Cruz Biotechnology                |
| GAPDH mouse monoclonal antibody                                          | Santa Cruz Biotechnology                |
| Anti-rabbit IgG (whole molecule) peroxidase conjugate secondary antibody | Cell Signaling Technology               |
| Anti-mouse IgG HRP-linked secondary antibody                             | Cell Signaling Technology               |
| Alexa Fluor 546 goat anti-mouse IgG secondary antibody                   | Thermo Fisher Scientific                |

FFAR, free fatty acid receptor; GPR41, G-protein-coupled receptor 41; GPR43, G-protein-coupled receptor 43; HLA-G, human leukocyte antigen G; HRP, horseradish peroxidase; PPAR $\gamma$ , peroxisome proliferator-activated receptor- $\gamma$ ; vWF, von Willebrand factor.
